# Supplementary material for: Nitrogen-Doped Porous Carbon Materials Derived from Graphene Oxide/Melamine Resin Composites for CO2 Adsorption
Source: MDPI journal article supplement (doi:10.3390/molecules26175293), 2021-08-31
Supplement: s1 [file s1]

## **Supplementary Information**

### **Nitrogen-Doped Porous Carbon Materials Derived from Graphene Oxide/Melamine Resin Composites for CO<sub>2</sub> Adsorption**

Like Ouyang, Jianfei Xiao, Housheng Jiang, Shaojun Yuan \*

Low-carbon Technology & Chemical Reaction Engineering Lab, College of  
Chemical Engineering, Sichuan University, Chengdu 610065, China

\* Corresponding author: [ysj@scu.edu.cn](mailto:ysj@scu.edu.cn) (S.J. Yuan), Tel./Fax: +86-28-85405201

## S1 Experimental Section

### S1.1 Calculation method for CO<sub>2</sub> adsorption capacity

Before the experiment, the adsorption system was evacuated with a vacuum pump until the pressure value was less than 0.2 kPa in the desired temperature. Then, the desired amount of adsorbate gas was supplied to the pressure tank and the molar number was calculated by the van der Waals equation at the equilibrium pressure and temperature. Finally, the adsorbate gas was admitted into the adsorption tank until the pressure indicator remains unchanged in 30 min, and it is considered that the adsorption equilibrium is achieved. The equilibrium pressure and temperature were recorded. The high purity helium as calibration gas, using the **Equation (S1)** to calculate the adsorption tank free space volume ( $V_{fs}$ ). **Equation (S2)** can be used to calculate the adsorption capacity of CO<sub>2</sub> gas (purity of 99.99 %) when it first enters the adsorption tank to achieve equilibrium. As long as the steps are repeated, the amount of adsorption under different pressures can be measured by **Equation (S3)**.

$$V_{fs} = \frac{V_p(v_{He-pfs} - v_{He-p})}{v_{He-p}} \quad (S1)$$

$$n_i = \frac{V_p}{v_{p,im}} - \frac{V_p + V_{fs}}{v_{pfs,im}} \quad i=1 \quad (S2)$$

$$n_i = n_{i-1} + \frac{V_p}{v_{p,im}} + \frac{V_{fs}}{v_{pfs,i-1m}} - \frac{V_p + V_{fs}}{v_{pfs,im}} \quad i=2,3,4\ldots \quad (S3)$$

Where  $V_p$  (63.55 mL) and  $V_a$  (12.45 mL) are volumes of pressure tank, adsorption tank respectively;  $V_{fs}$  (mL) is the effective free space volume after

placing the adsorbent;  $v_{He-p}$  (mL/mol) is the molar volume of helium gas filled with the pressure tank;  $v_{He-pfs}$  (mL/mol) is the molar volume of adsorption tank when helium reaches equilibrium of adsorption;  $v_{p,i}$  (mL/mol) is the molar volume of CO<sub>2</sub> gas filled with the pressure tank;  $v_{pfs,i}$  (mL/mol) is the molar volume of adsorption tank when CO<sub>2</sub> gas reaches equilibrium of adsorption;  $m(g)$  is the mass of adsorbent and  $i$  is the number of adsorption equilibrium.

## S2 Results and Discussion

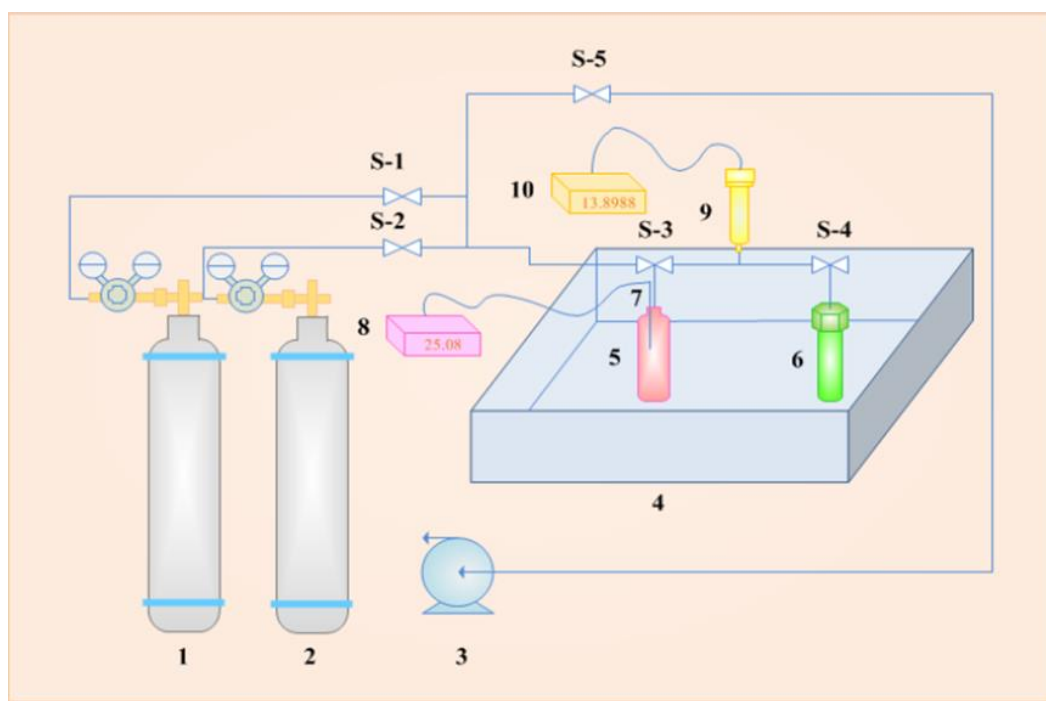

**Figure S1.** Diagram of the experimental apparatus: (1) helium tank, (2) carbon dioxide tank, (3) vacuum pump, (4) thermostatic bath box, (5) pressure tank, (6) adsorption tank, (7) temperature sensor, (8) temperature monitor, (9) pressure sensor and (10) pressure monitor.

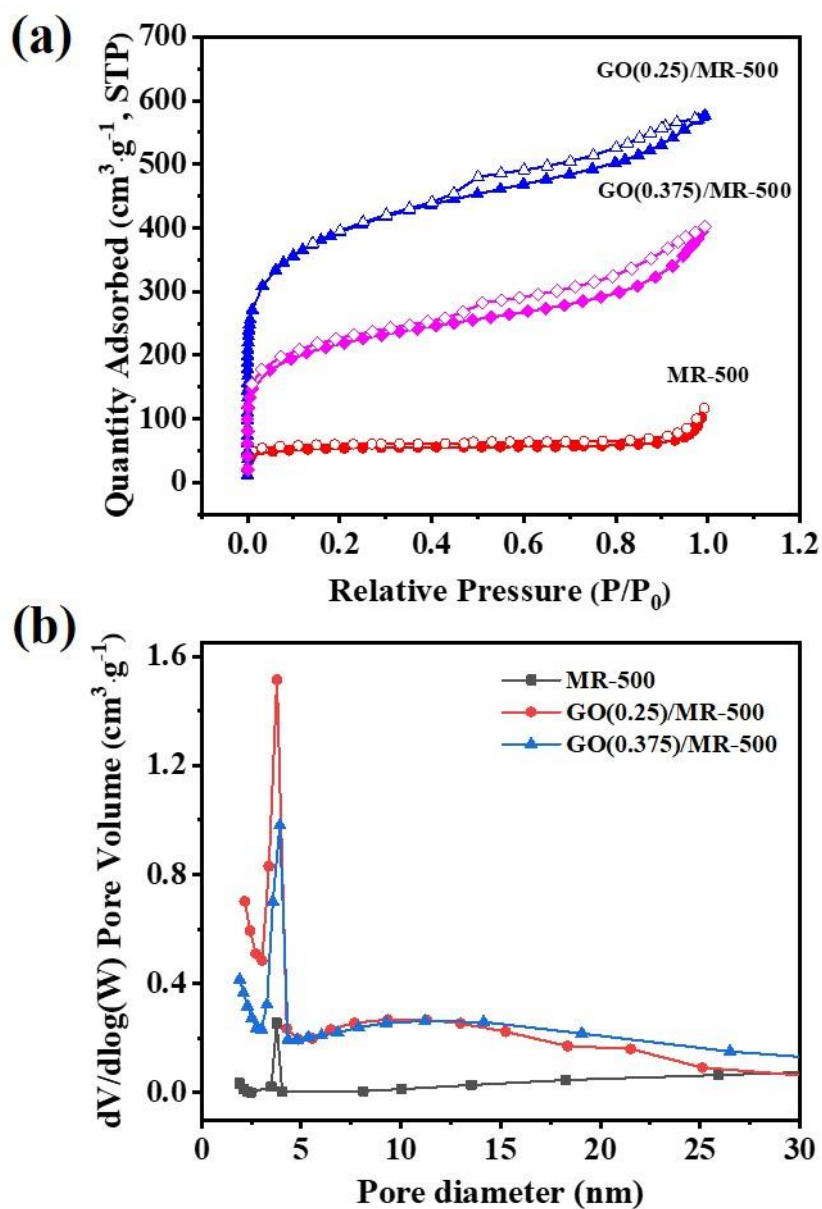

**Figure S2.** (a) N<sub>2</sub> adsorption-desorption isotherms and (b) Pore size distributions of GO/MR derived nitrogen-rich porous carbon materials with different adding amount of GO activated at 500.

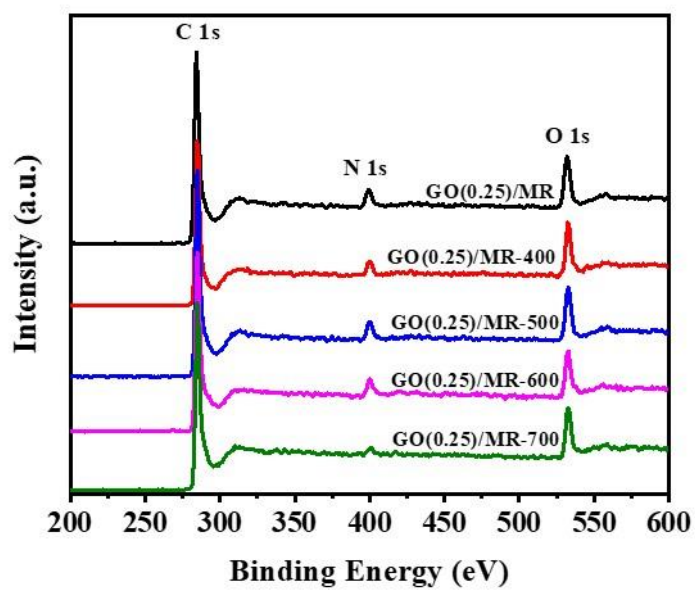

**Figure S3.** Wide scan XPS spectra of s GO(0.25)/MR and GO(0.25)/MR derived nitrogen-rich porous carbon materials obtained at different activation temperature.

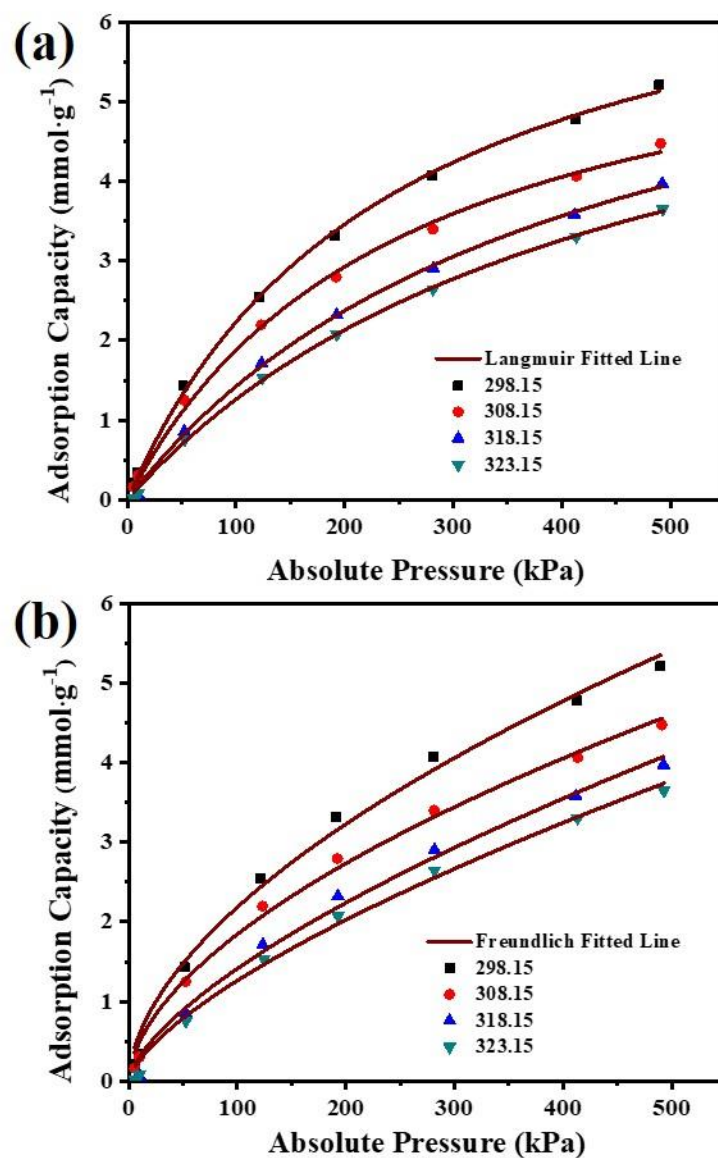

**Figure S4.** (a) Langmuir and (b) Freundlich isotherm models on experimental CO<sub>2</sub> adsorption at different temperature for GO(0.25)/MR-500.

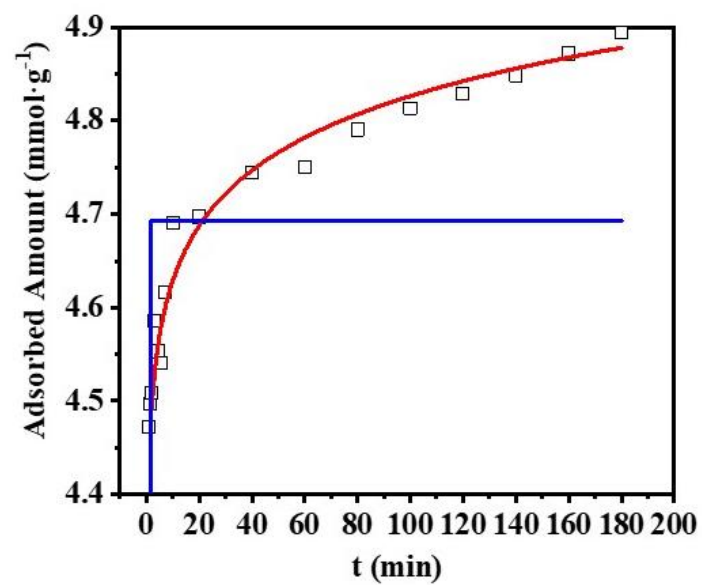

**Figure S5.** Detail view of CO<sub>2</sub> adsorption kinetics at 298.15 K for GO(0.25)/MR-500 (the adsorption amount rang: 4.4-4.9 mmol·g<sup>-1</sup>).



**Table S1.** Nitrogen species of the GO(0.25)/MR precursor and GO(0.25)/MR derived porous carbon materials derived from the N1s XPS spectra.

| Sample          | Nitrogen (wt%) |               |            |              |            |
|-----------------|----------------|---------------|------------|--------------|------------|
|                 | Pyridinic-N    | Amide/Imide-N | Pyrrolic-N | Quaternary-N | Oxidized-N |
| GO(0.25)/MR     |                | 71.9          |            | 28.1         |            |
| GO(0.25)/MR-400 | 42.5           |               | 45.1       | 9.1          | 3.3        |
| GO(0.25)/MR-500 | 28.3           |               | 56.6       | 9.6          | 5.5        |
| GO(0.25)/MR-600 | 25.4           |               | 55.2       | 11.3         | 8.1        |
| GO(0.25)/MR-700 | 29.8           |               | 54.3       | 16.0         |            |

**Table S2.** Adsorption thermodynamic parameters of GO(0.25)/MR-500 at different CO<sub>2</sub> adsorption capacities.

| CO <sub>2</sub> uptake (mmol·g <sup>-1</sup> ) | ΔH (kJ·mol <sup>-1</sup> ) | ΔS (J·mol <sup>-1</sup> ·K <sup>-1</sup> ) |
|------------------------------------------------|----------------------------|--------------------------------------------|
| 0.5                                            | -29.88                     | 183.9                                      |
| 1.5                                            | -26.81                     | 180.7                                      |
| 2.5                                            | -24.99                     | 180.3                                      |
| 3.5                                            | -24.43                     | 179.1                                      |

**Table S3.** Fitted parameters of CO<sub>2</sub> adsorption kinetic models on the GO(0.25)/MR-500 at 298.15 K.

| Sample          | Models            | Fitted Parameters                      |                                        |                                           |        |                                     |                |
|-----------------|-------------------|----------------------------------------|----------------------------------------|-------------------------------------------|--------|-------------------------------------|----------------|
|                 |                   | k <sub>F</sub><br>(min <sup>-n</sup> ) | k <sub>L</sub><br>(min <sup>-1</sup> ) | Q <sub>e</sub><br>(mmol·g <sup>-1</sup> ) | n      | χ <sup>2</sup> (×10 <sup>-3</sup> ) | R <sup>2</sup> |
| GO(0.25)/MR-500 | Fickian diffusion | 2.11                                   | -                                      | 4.87                                      | 0.0181 | 1.46                                | 0.999          |
|                 | LDF               | -                                      | 4.68                                   | 4.69                                      | -      | 18.21                               | 0.985          |
